# Supplementary material
Source: Research Square preprint supplement (doi:10.21203/rs.3.rs-9439368/v1)
Supplement: Supplementary file 1 [file 203a77c95660496094540b69.docx]

**Supplementary Material**

**1. Supplementary Figures**

**1.1 UHPLC-MS/MS identification of chemical constituents in SLBZS**


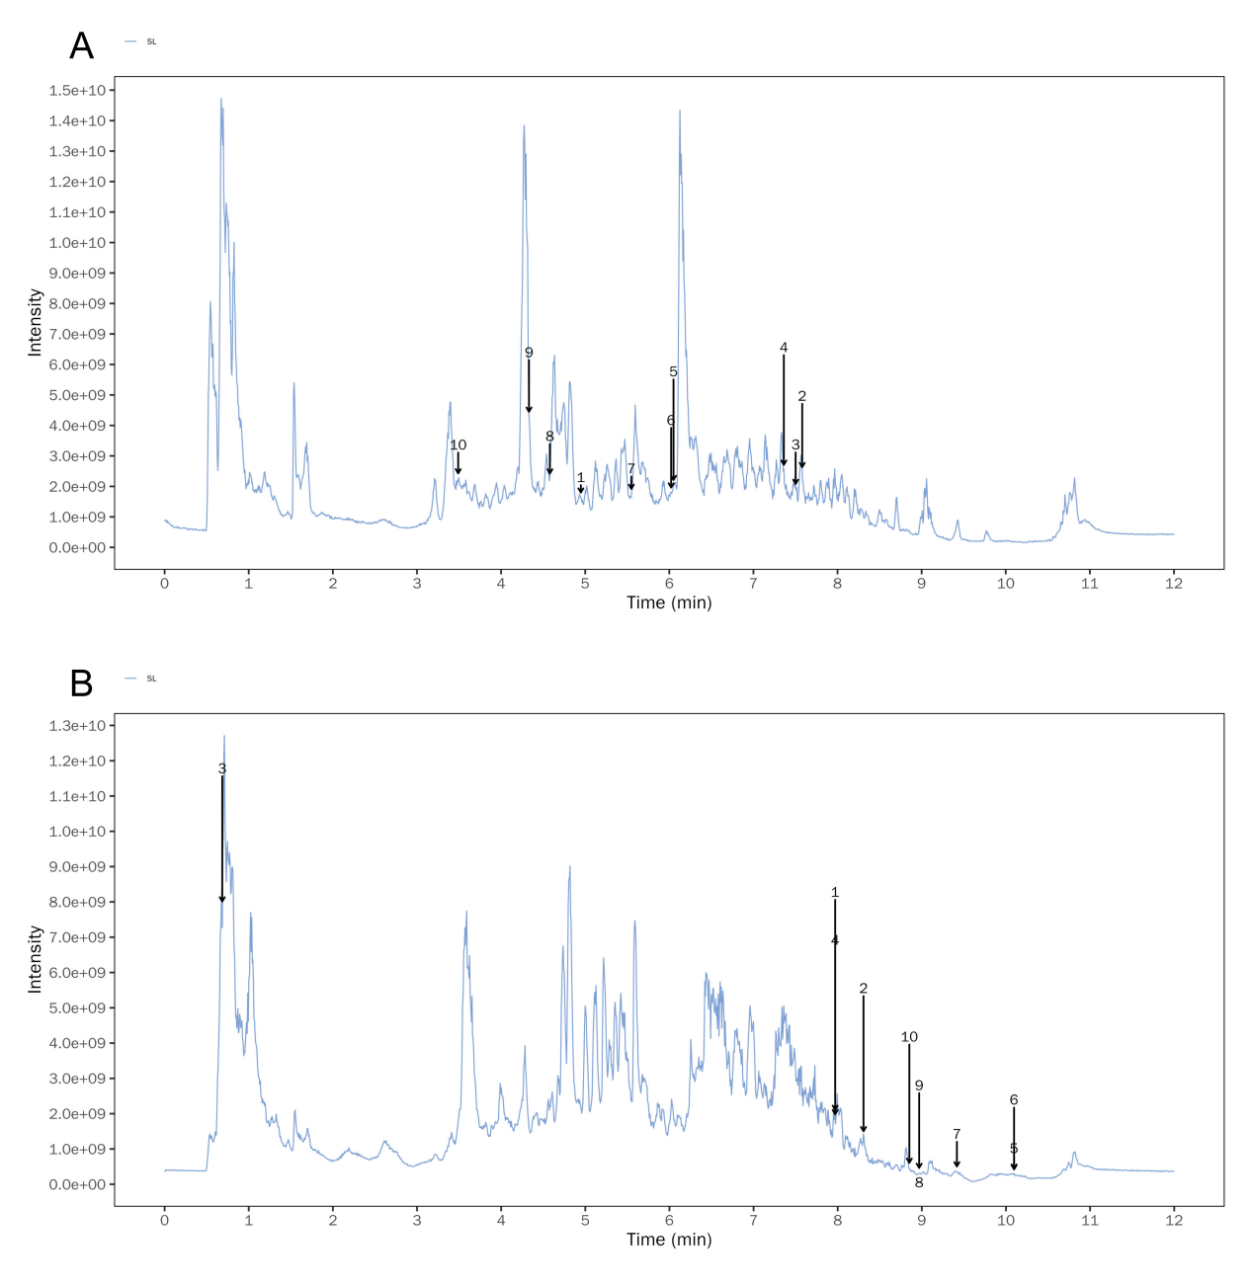


**Supplementary Figure 1.**

UHPLC-MS/MS identification of chemical constituents in SLBZS. (A) Positive ion mode. (B) Negative ion mode.

**1.2 Original western blot images**


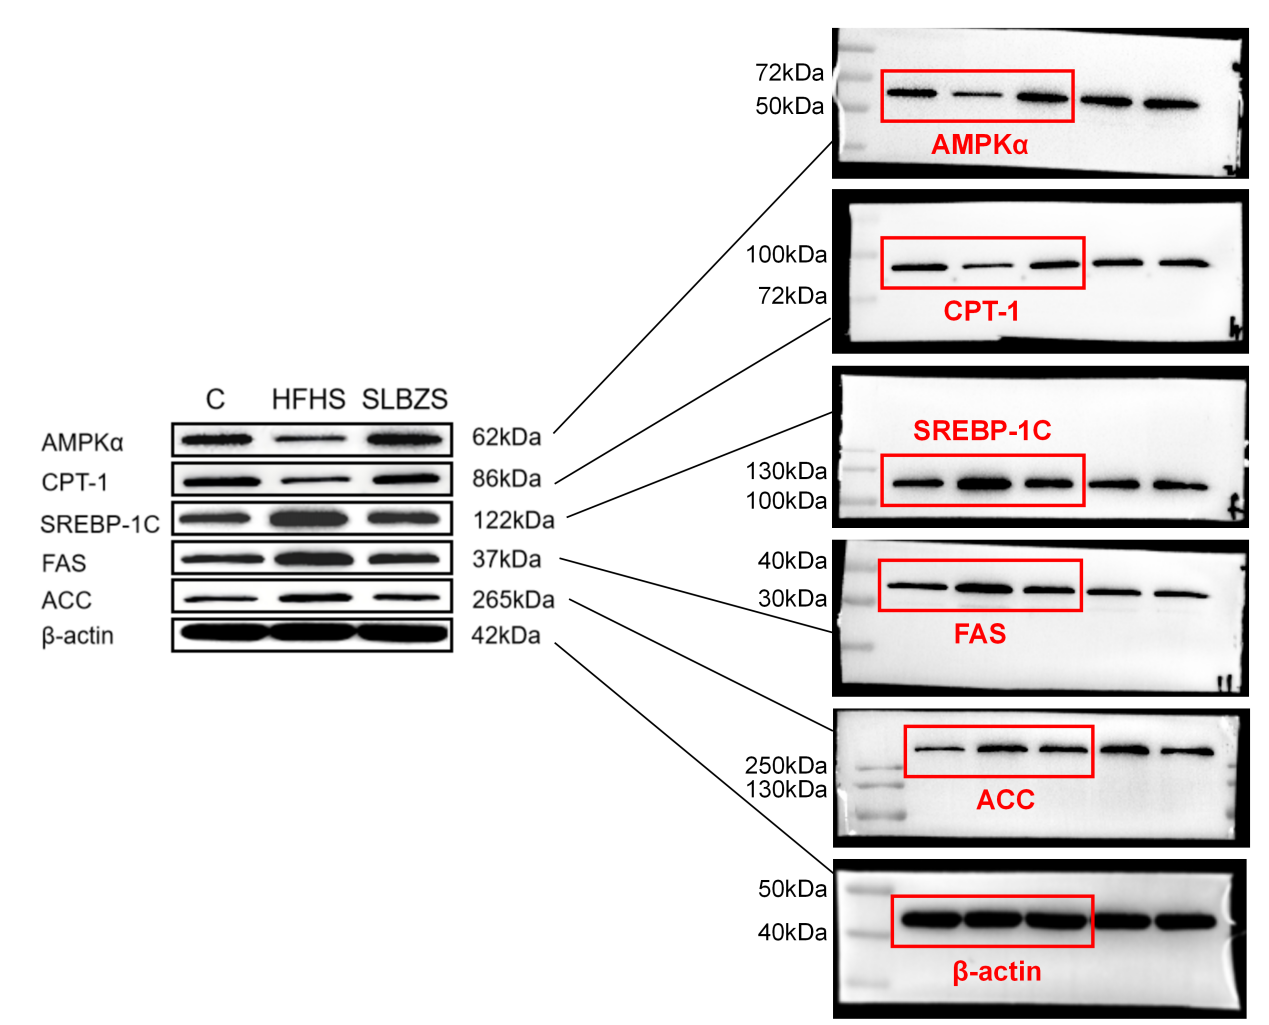


**Supplementary Figure 2.**

Full uncropped western blot images of the liver.


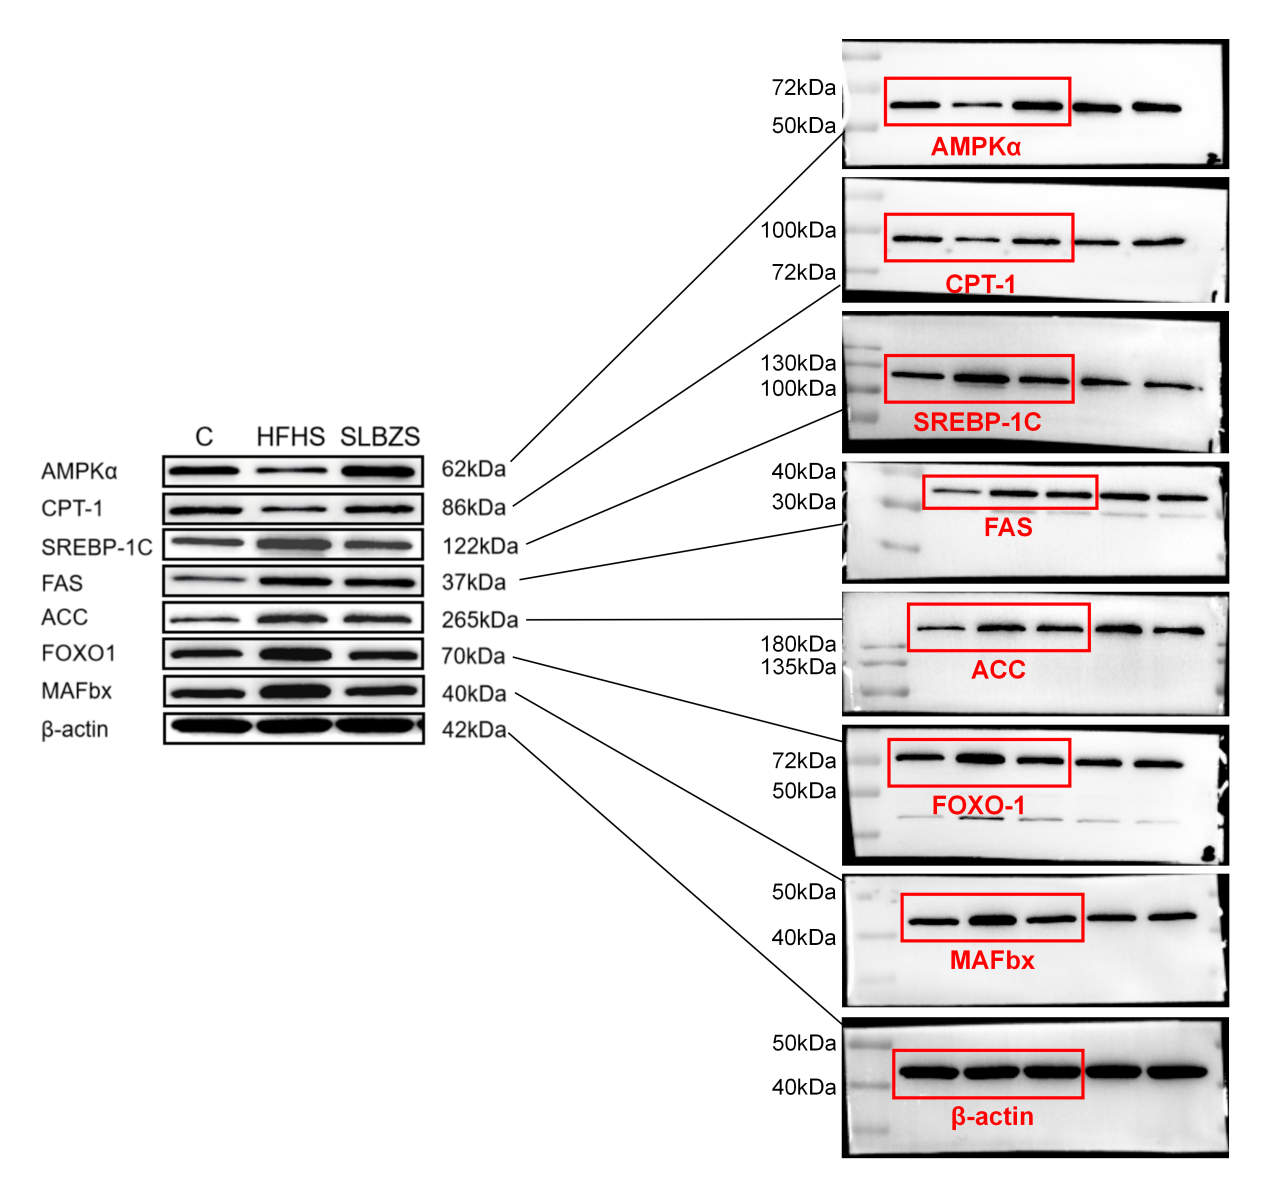


**Supplementary Figure 3.**

Full uncropped western blot images of the gastrocnemius.

**2. Supplementary Tables**

**Supplementary Table 1.** The composition of SLBZS.

| **Chinese name** | **English name** | **Latin name of the plants** |
| --- | --- | --- |
| Ren Shen | Ginseng | *Panax ginseng* C. A. Mey. |
| Fu Ling | Poria | *Poria cocos* (Schw.) Wolf |
| Bai Zhu | Atractylodes Rhizome | *Atractylodes macrocephala* Koidz. |
| Shan Yao | Dioscorea Rhizome | *Dioscorea opposita* Thunb. |
| Bai Bian Dou | Lablab Semen Album | *Lablab purpureus* (L.) Sweet |
| Lian Zi | Nelumbinis Semen | *Nelumbo nucifera* Gaertn. |
| Yi Yi Ren | Coicis Semen | *Coix lacryma-jobi* L. var. *ma-yuen* (Roman.) Stapf |
| Sha Ren | Amomi Fructus | *Amomum villosum* Lour. |
| Jie Geng | Platycodonis Radix | *Platycodon grandiflorus* (Jacq.) A. DC. |
| Gan Cao | Glycyrrhizae Radix et Rhizoma | *Glycyrrhiza uralensis* Fisch. |

**Supplementary Table 2.**Positive ion mode TIC peak gauge

| **ID** | **MS2_name** | **Formula** | **mzmed** | **rtmed** |
| --- | --- | --- | --- | --- |
| 1 | Kaempferol-3-O-galactoside | C21H20O11 | 449.1062 | 296.9 |
| 2 | Benzoylacetone | C10H10O2 | 163.0745 | 454.8 |
| 3 | 3,5-dihydroxy-7-methoxy-2-(4-methoxyphenyl)  chromen-4-one | C17H14O6 | 315.0849 | 450.1 |
| 4 | Glycyrol | C21H18O6 | 367.1159 | 441.7 |
| 5 | Pseudo-ginsenoside F11 | C42H72O14 | 801.4961 | 363 |
| 6 | Pratensein | C16H12O6 | 301.0693 | 361.3 |
| 7 | 3'-Methoxydaidzein | C16H12O5 | 285.0744 | 332.9 |
| 8 | Glycitin | C22H22O10 | 447.1267 | 274.8 |
| 9 | Daidzin | C21H20O9 | 417.1163 | 259.9 |
| 10 | Higenamine | C16H17NO3 | 272.1271 | 209.4 |

**Supplementary Table 3.**Negative ion mode TIC peak gauge

| **ID** | **MS2_name** | **Formula** | **mzmed** | **rtmed** |
| --- | --- | --- | --- | --- |
| 1 | Anemosapogenin | C30H48O4 | 471.3471 | 478.2 |
| 2 | 18α-Glycyrrhetinic acid | C30H46O4 | 469.331 | 498.4 |
| 3 | 4-Aminobutyric acid (GABA) | C4H9NO2 | 102.0557 | 41.1 |
| 4 | (1R,2R,4aS,6aS,6bR,10S,12aR)-1,10-  dihydroxy-1,2,6a,6b,9,9,12a-heptamethyl-  2,3,4,5,6,6a,7,8,8a,10,11,12,13,14b-tetradecahy  dropicene-4a-carboxylic acid | C30H48O4 | 471.3471 | 478.2 |
| 5 | Ethyl stearate | C20H40O2 | 311.2945 | 605.8 |
| 6 | Butyl palmitate | C20H40O2 | 311.2945 | 605.8 |
| 7 | Oleic acid | C18H34O2 | 281.2475 | 565 |
| 8 | Lauryl acetate | C14H28O2 | 227.2008 | 538.1 |
| 9 | Myristic acid | C14H28O2 | 227.2008 | 538.1 |
| 10 | (4aS,6aS,6bR,10S,12aR)-10-hydroxy-  2,2,6a,6b,9,9,12a-heptamethyl-1,3,4,5,6,6a,  7,8,8a,10,11,12,13,14b-tetradecahydropicene  -4a-carboxylic acid | C30H48O3 | 455.3516 | 531.1 |

**Supplementary Table 4.**Main reagents and kits

| **Reagent** | **Resource** | **Identifier** |
| --- | --- | --- |
| Shenling Baizhu San | Beijing Tongrentang Pharmaceutical Factory | Cat#:25101025 |
| Hepatic triglyceride (TG) | Nanjing Jiancheng Bioengineering | Cat#:A110-1-1 |
| Hepatic total cholesterol (TC) | Nanjing Jiancheng Bioengineering | Cat#:A111-1-1 |
| Low-density lipoprotein （LDL） | Nanjing Jiancheng Bioengineering | Cat#:A113-1-1 |
| High-density lipoprotein （HDL） | Nanjing Jiancheng Bioengineering | Cat#:A112-1-1 |
| Serum alanine aminotransferase (ALT) | Nanjing Jiancheng Bioengineering | Cat#:C009-2-1 |
| Serum aspartate aminotransferase (AST) | Nanjing Jiancheng Bioengineering | Cat#:C010-2-1 |
| Gamma-glutamyl transpeptidase (GGT) | Nanjing Jiancheng Bioengineering | Cat#:C017-2-1 |
| Glucose (GLU) | Nanjing Jiancheng Bioengineering | Cat#:A154-1-1 |
| Malondialdehyde (MDA) assay kit | Nanjing Jiancheng Bioengineering | Cat#:A003-1-2 |
| Insulin (INS) assay kits | Nanjing Jiancheng Bioengineering | Cat#:H203-1-2 |
| Hematoxylin-eosin staining | Wuhan Servicebio | Cat#:GP1031 |
| Oil Red O staining | Wuhan Servicebio | Cat#:GP1067 |
| TRIzol Rearent | Tiangen Biochemical Technology (Beijing) Co., LTD | Cat#:DP424 |
| ReverTra Ace qPCR RT Master Mix with gDNA Remover | TOYOBO CO.,LTD | Cat#:FSQ-301 |
| Realtime PCR Master Mix | TOYOBO CO.,LTD | Cat#:QPK-201 |
| AMPK alpha Antibody | Jiangsu Qinke Biological Research Center Co., Ltd., China | Cat#:AF3423 |
| SREBP1 Antibody | Jiangsu Qinke Biological Research Center Co., Ltd., China | Cat#:AF4728 |
| FAS Antibody | Jiangsu Qinke Biological Research Center Co., Ltd., China | Cat#:AF5342 |
| ACC Antibody | Jiangsu Qinke Biological Research Center Co., Ltd., China | Cat#:AF6421 |
| CPT1A Antibody | Jiangsu Qinke Biological Research Center Co., Ltd., China | Cat#:DF12004 |
| FOXO1 Antibody | Jiangsu Qinke Biological Research Center Co., Ltd., China | Cat#:AF6416 |
| FBXO32 Antibody(MAFbx) | Jiangsu Qinke Biological Research Center Co., Ltd., China | Cat#:DF7075 |
| Beta-Actin | Jiangsu Qinke Biological Research Center Co., Ltd., China | Cat#:AF7018 |
| Marker | Changsha Xinli Zhihe Technology Co., Ltd. | Cat#:AC0551 |
| Horseradish peroxidase (HRP)-conjugated secondary antibodies | Jiangsu Qinke Biological Research Center Co., Ltd., China | Cat#:S0001 |
| bicinchoninic acid (BCA) assay | Beyotime Biotechnology | Cat#:P0010S |
